# Supplementary material
Source: MDPI journal article supplement (https://www.mdpi.com/2673-1924/4/1/7)
Supplement: s1 [file s1]

Archive with 3 entries (3 files):
- oceans-2017163-tex.zip
- oceans-2017163.pdf
- oceans-2017163.zip
